# Supplementary material for: Synthesis of poly(hexachlorocyclotriphosphazene-co-phenolphthalein) microspheres with negative charges for the selective removal of cationic dyes
Source: Royal Society of Chemistry journal article supplement (doi:10.1039/d4nj03519d), 2024-01-01
Supplement: d4nj03519d1.pdf [file d4nj03519d1.pdf]

**Synthesis of poly(hexachlorocyclotriphosphazene-co-phenolphthalein)  
microspheres with negative charges for the selective removal of cationic dyes**

Minghuan Wang,<sup>1,3\*</sup> Yunfei Song,<sup>1</sup> Zhiqiang Xu,<sup>1</sup> Jiying Wang,<sup>1</sup> Hekai Zhang,<sup>1</sup> Fang  
Chen,<sup>1</sup> Yaqin Chang,<sup>1</sup> Peng Wei,<sup>1</sup> Li Yin<sup>2\*</sup>, Jianwei Fu<sup>3\*</sup>

1 College of Intelligent Textile and Fabric Electronics, Zhongyuan University of  
Technology, Zhengzhou, 450007, Henan, PR China

2 College of Physics and Optoelectronic Engineering, Zhongyuan University of  
Technology, Zhengzhou, 450007, Henan, PR China

3 School of Materials Science and Engineering, Zhengzhou University, Zhengzhou,  
450001, Henan, PR China

**\*Corresponding author:**

Minghuan Wang

College of Intelligent Textile and Fabric Electronics, Zhongyuan University of  
Technology, Zhengzhou, 450007, Henan, PR China

Tel: 86+371-62506970, Fax: 86+371-62506970

E-mail Address: wmh545@163.com (M. H. Wang)

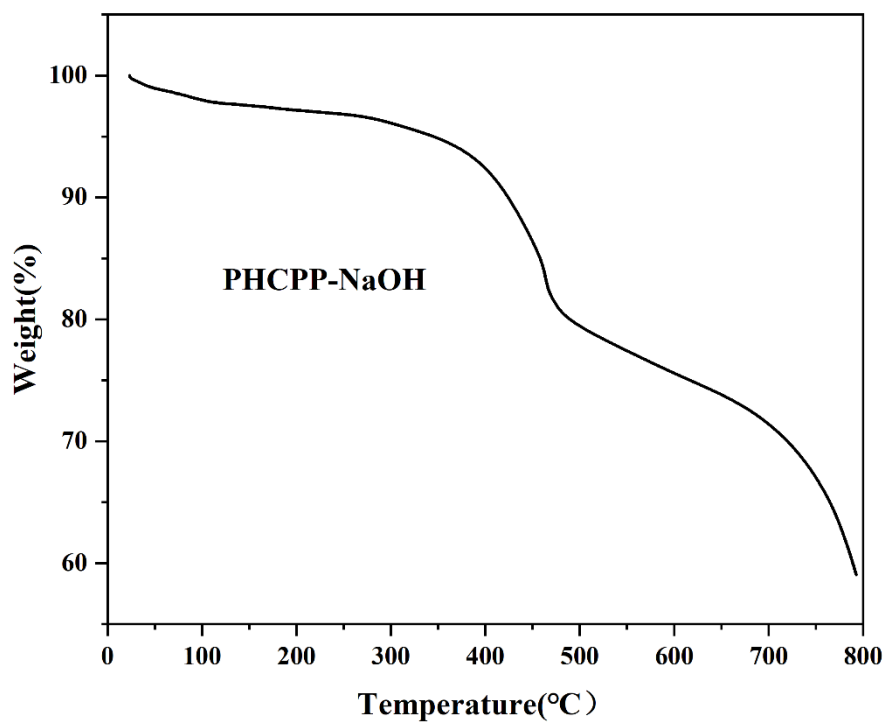

Figure S1. The thermogravimetric analysis curves of prepared PHCPP-NaOH.

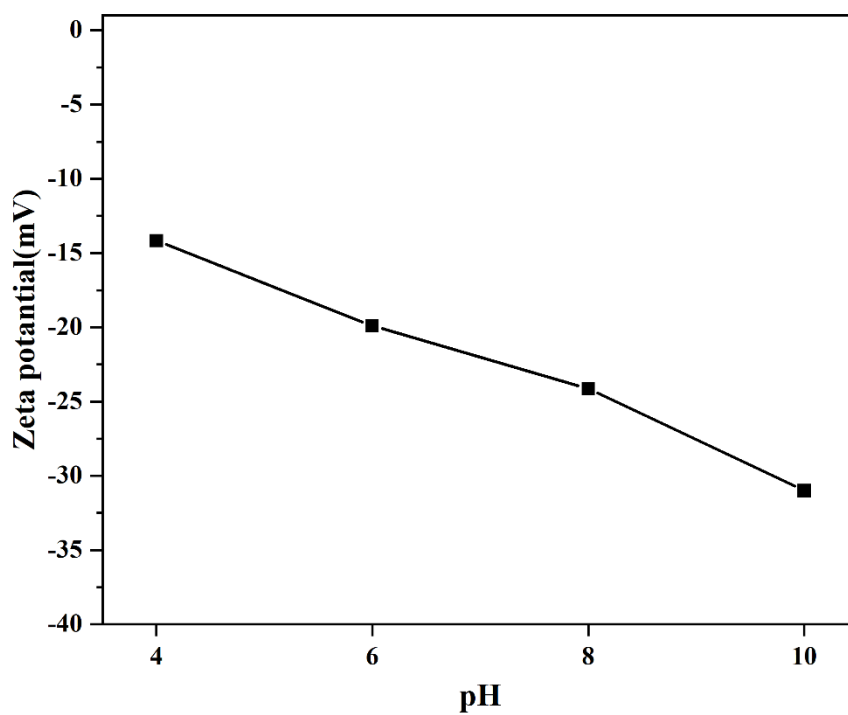

Figure S2. The zeta potential analysis curves of prepared PHCPP-NaOH.

The pseudo-first-order kinetic model (equation S1) and pseudo-second-order kinetic model (equation S2) to fit the experimental data.

$$\ln (q_e - q_t) = \ln (q_e) - k_1 t \quad \text{equation S1}$$

$$\frac{t}{q_t} = \frac{1}{k_2 q_e^2} + \frac{1}{q_e} t \quad \text{equation S2}$$

Where  $k_1$  ( $\text{min}^{-1}$ ) and  $k_2$  ( $\text{g/mg/min}$ ) represent the rate constants for the pseudo-first-order kinetic model and pseudo-second-order kinetic model, respectively.

Weber's intraparticle diffusion model is an important tool for studying and applying mass transfer and reaction processes in porous media. It helps provide relevant information about different stages of the adsorption process, contributing to a deeper understanding of adsorption characteristics. The equation is expressed as follows equation S3:

$$q_t = K_{ji} t^{1/2} + c_i \quad \text{equation S3}$$

Where  $K_{ji}$  represents the intraparticle diffusion rate constant, and  $c_i$  is the intercept of the linear portion of the equation.

The Langmuir adsorption isotherm model is a classic adsorption model used to describe the adsorption behavior of molecules on an adsorbent surface. The Langmuir model is based on a key assumption that adsorbed molecules on the surface can only form a single molecular layer. This implies that the adsorption sites on the adsorbent surface are limited, and once occupied, they are no longer available for the adsorption of other molecules. The equation for this model can be described as follows:

$$\frac{c_e}{q_e} = \frac{1}{k_L q_0} + \frac{c_e}{q_0} \quad \text{equation S4}$$

Where  $k_L$  ( $\text{L/mg}$ ) is the Langmuir constant and  $q_0$  ( $\text{mg/g}$ ) is the maximum monolayer adsorption capacity.

The Freundlich isotherm model is suitable for describing adsorption behavior on heterogeneous surfaces. Unlike the Langmuir model, the Freundlich model does not assume that the adsorbed molecules form a single monolayer on the surface. Instead, it allows for the formation of multiple layers of adsorption on the adsorbent surface, making it applicable to various adsorption systems. The equation is defined as:

$$\ln q_e = \ln k_F + \frac{1}{n} \ln c_e \quad \text{equation S5}$$

The Freundlich constants,  $k_F$  (mg/g) and  $1/n$  (with  $n$  as the unit of L/mg), correspond to the adsorption capacity and adsorption intensity, respectively, in the Freundlich isotherm model.

The enthalpy change ( $\Delta H^0$ ), entropy change ( $\Delta S^0$ ), and free energy change ( $\Delta G$ ) can be determined using the following equations:

$$\ln k_d = \frac{\Delta S^0}{R} - \frac{\Delta H^0}{RT} \quad \text{equation S6}$$

$$\Delta G^0 = -RT \ln k_d \quad \text{equation S7}$$

$$k_d = \frac{q_e}{c_e} \quad \text{equation S8}$$

Where  $k_d$  (L/mol) is the Langmuir equilibrium constant,  $T$  (K) is the absolute temperature,  $R$  (8.314 (J/mol K)) is the gas constant.
